# Supplementary material for: NestedAE: interpretable nested autoencoders for multi-scale materials characterization
Source: Royal Society of Chemistry journal article supplement (doi:10.1039/d3mh01484c), 2023-11-15
Supplement: d3mh01484c1.pdf [file d3mh01484c1.pdf]

# Supplementary Material for “NestedAE: Interpretable Nested Autoencoders for Multi-Scale Materials Characterization”

Nikhil Thota<sup>‡,b</sup>, Maitreyee Sharma Priyadarshini<sup>‡,a,b</sup>, and Rigoberto Hernandez<sup>\*,a,b,c</sup>

<sup>a</sup>Department of Chemistry, Johns Hopkins University, Baltimore, MD 21218

<sup>b</sup>Department of Chemical and Biomolecular Engineering, Johns Hopkins University, Baltimore, MD 21218

<sup>c</sup>Department of Materials Science and Engineering, Johns Hopkins University, Baltimore, MD 21218

<sup>‡</sup>These authors contributed equally to this work

<sup>\*</sup>Correspondence: r.hernandez@jhu.edu

In this supplementary material, we provide the functions and associated parameters of the synthetic dataset reported in the main article, a comparison of the latent structures between the NestedAE and single AE results, and a latent split analysis for the NestedAE architecture.

## S1 ANALYTICAL FUNCTIONS COMPRISING THE SYNTHETIC DATASET

The 13 analytical functions that comprise the synthetic dataset are:

$$\begin{aligned}f_1(z_1, z_2; \epsilon_1) &= z_1^2 + z_2^2 - 2 z_1 z_2 + \epsilon_1, \\f_2(z_1, z_2; \epsilon_2) &= \sin z_1 + \cos z_1 + \sin 2z_1 + \cos 2z_1 + \sin z_2 + \cos z_2 + \sin 2z_2 + \cos 2z_2 + \epsilon_2, \\f_3(z_1, z_2; \epsilon_3) &= \exp -z_1 + \exp -z_2 + \epsilon_3, \\f_4(z_1, z_2; \epsilon_4) &= \tanh z_1 + \tanh z_2 + \epsilon_4, \\f_5(\vec{z}; \epsilon_5) &= z_1 z_2 - z_3 - z_4 + \epsilon_5, \\f_6(z_1, z_2, z_5; \epsilon_6) &= \sin z_1 z_2 + \sin 2z_5 + \epsilon_6, \\f_7(z_3, z_4, z_5; \epsilon_7) &= \exp -\frac{(z_3^2 + z_4^2 + z_5^2)}{z_3 + z_4 + z_5} + \epsilon_7, \\f_8(z_1, z_2, z_3; \epsilon_8) &= \tanh z_1 + \tanh z_2 + \tanh z_3 + \tanh z_4 + \tanh z_5 + \epsilon_8, \\f_9(\vec{z}; \epsilon_9) &= \log z_1 + \log |z_2| + \log z_3 + \log z_4 + \log z_5 + \epsilon_9, \\f_{10}(\vec{z}; \epsilon_{10}) &= z_1^2 + z_2^2 - 2 z_1 z_2 + z_3^2 + z_4^2 + z_5^2 - z_3 z_4 z_5 + \epsilon_{10}, \\f_{11}(z_1, z_5; \epsilon_{11}) &= \sin z_1 + \sin z_5 + \epsilon_{11}, \\f_{12}(\vec{z}; \epsilon_{12}) &= \frac{1}{24} \left( z_1^4 - 16 z_1^3 + 72 z_1^2 - 96 z_1 + 24 \right) + \\&\quad \frac{1}{24} \left( z_2^4 - 16 z_2^3 + 72 z_2^2 - 96 z_2 + 24 \right) + \\&\quad \frac{1}{24} \left( z_3^4 - 16 z_3^3 + 72 z_3^2 - 96 z_3 + 24 \right) + \\&\quad \frac{1}{24} \left( z_4^4 - 16 z_4^3 + 72 z_4^2 - 96 z_4 + 24 \right) + \\&\quad \frac{1}{24} \left( z_5^4 - 16 z_5^3 + 72 z_5^2 - 96 z_5 + 24 \right) + \epsilon_{12}, \\f_{13}(\vec{z}; \epsilon_{13}) &= z_1^2 + z_2^2 + z_3^2 + z_4^2 + z_5^2 + \epsilon_{13}.\end{aligned}$$

where the  $\epsilon_i$  represent noise. In the noiseless limit,  $\epsilon_i = 0$  for all  $i$ . We also considered a Gaussian noise case in which  $\epsilon_i \in \mathcal{N}(0, \sigma_i)$  where  $\mathcal{N}$  represents a Gaussian distribution with width  $\sigma_i$ . In this work, we set  $\sigma_i = 0.5$  for  $i \in (1, \dots, 4)$  and  $\sigma_i = 1.0$  for  $i \in (5, \dots, 13)$ .

The range for  $z_1$  through  $z_5$  is set to:

$$\begin{aligned} z_1 &= [0.01, 5.0], \\ z_2 &= [2.0, 5.0], \\ z_3 &= [0.5, 10], \\ z_4 &= [0.5, 10], \\ z_5 &= 10 * U(0, 1), \end{aligned}$$

where  $U(0, 1)$  represents a uniform distribution between (0,1).

## S2 LATENT SPACE ANALYSIS FOR SYNTHETIC DATASET

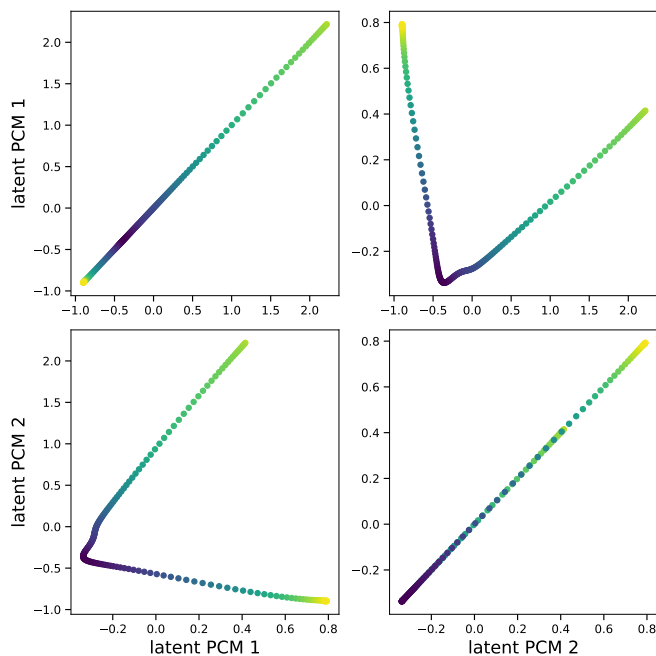

Figure S1: Latent space structures obtained from training the first autoencoder in the NestedAE architecture. The latent space is colored based on the  $L_2$  norm of the 13 analytical functions described in Sec. S1. The x- and y-axes denote the Principal Component Modes (PCMs) of the latent space.

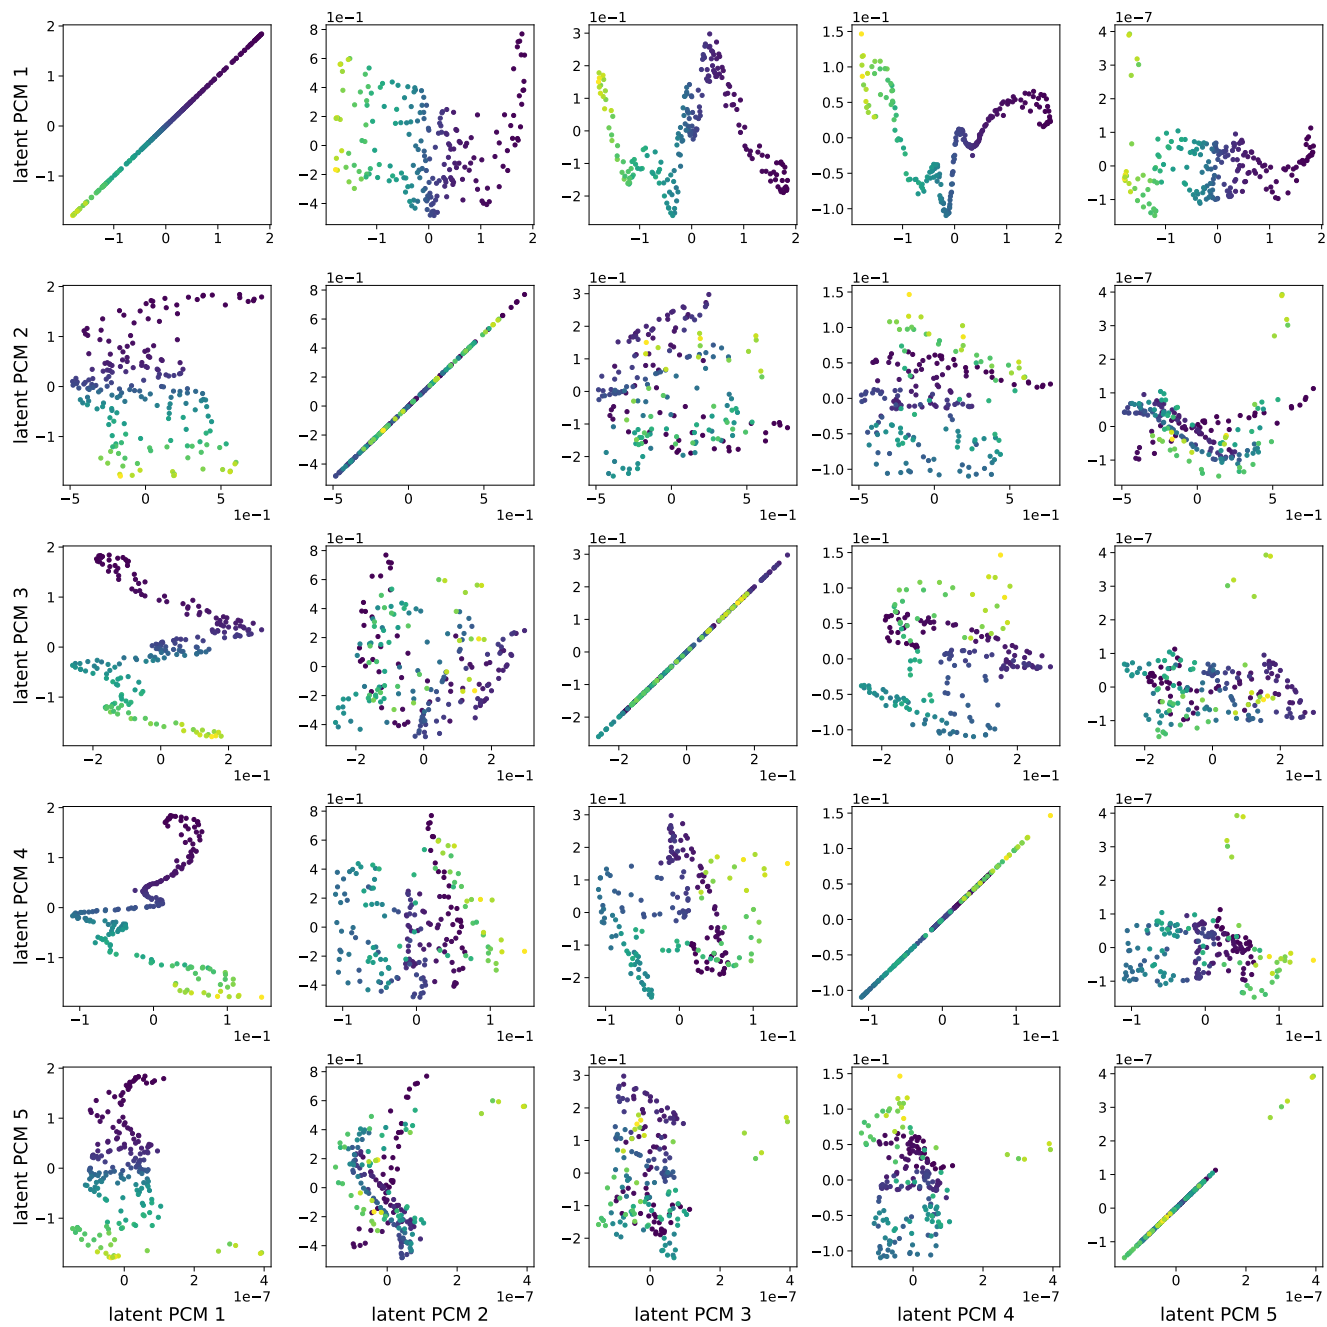

Figure S2: Latent space structures obtained from training the second autoencoder in the NestedAE architecture. The latent space is colored based on the  $L_2$  Norm of the 13 analytical functions described in Sec. S1. The x- and y-axes denote the PCMs of the latent space.

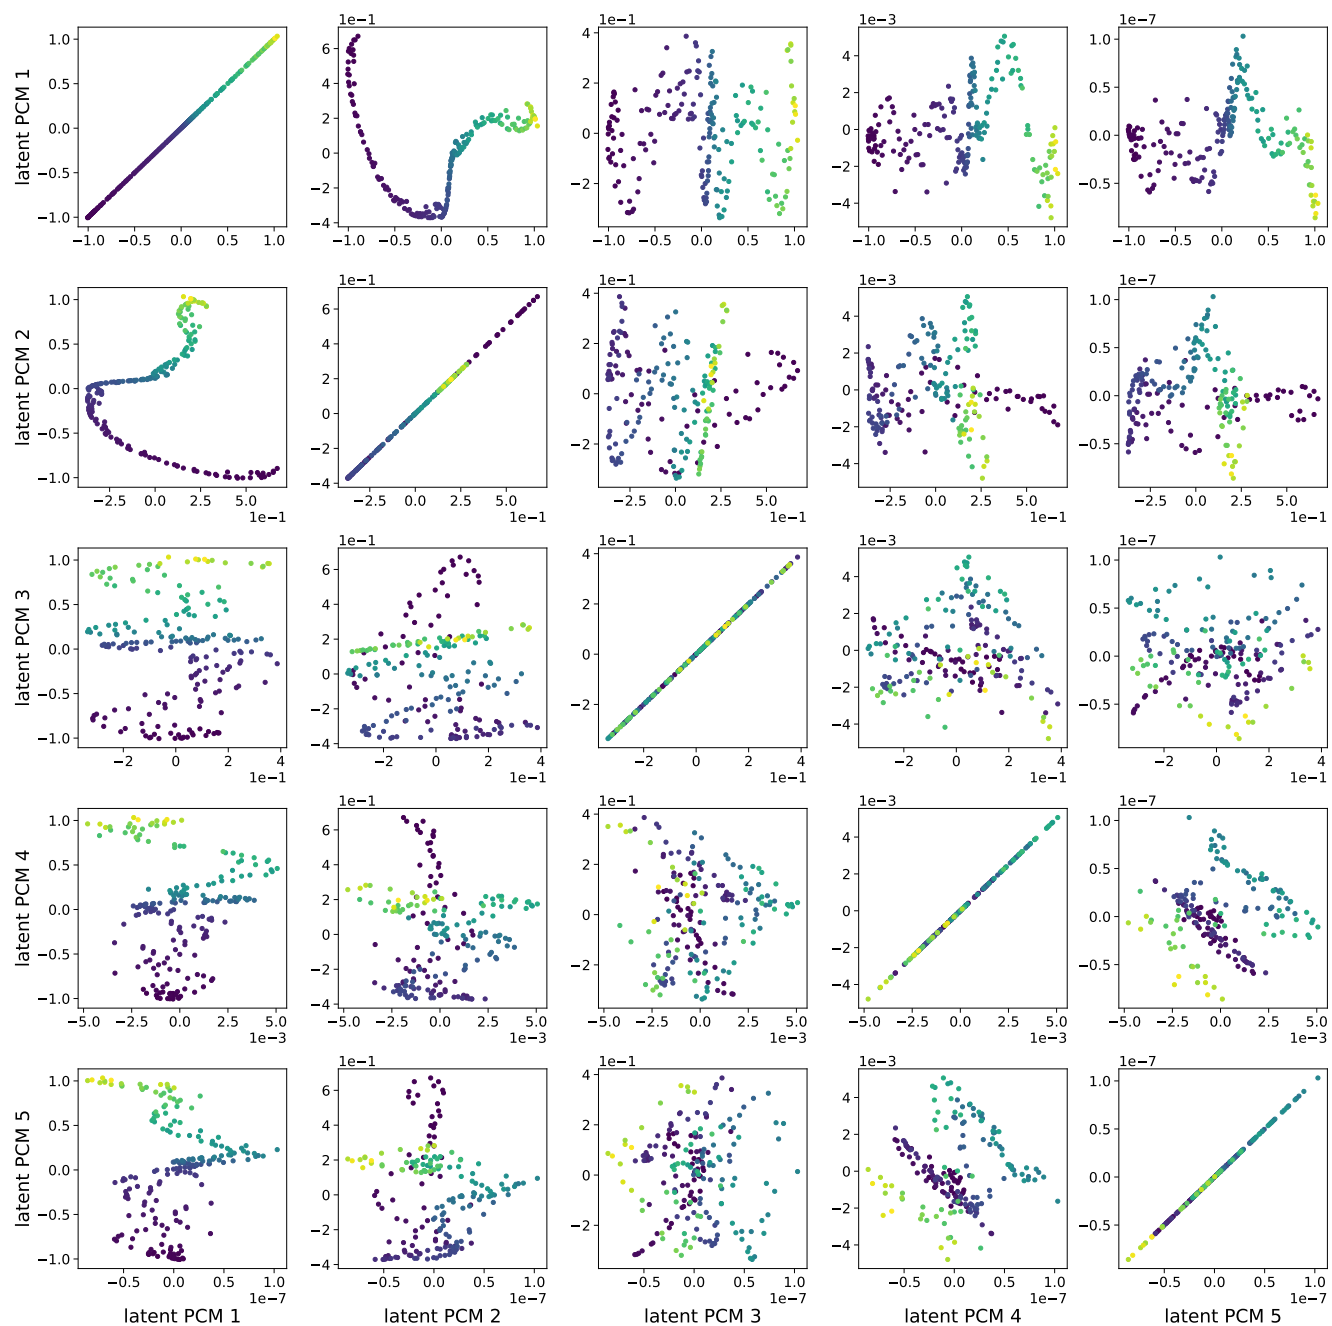

Figure S3: Latent space structures obtained from training a single autoencoder on the constructed synthetic dataset. The latent space is colored based on the  $L_2$  Norm of the 13 analytical functions described in Sec. S1. The x- and y-axes denote the PCMs of the latent space.
